# Supplementary material for: Effect of Cu2O Substrate on Photoinduced Hydrophilicity of TiO2 and ZnO Nanocoatings
Source: MDPI journal article supplement (doi:10.3390/nano11061526), 2021-06-09
Supplement: s1 [file s1]

Supporting information

# Effect of Cu<sub>2</sub>O Substrate on Photoinduced Hydrophilicity of TiO<sub>2</sub> and ZnO Nanocoatings

Maria V. Maevskaya <sup>1</sup>, Aida V. Rudakova <sup>1</sup>, Alexei V. Emeline <sup>1</sup> and Detlef W. Bahnemann <sup>1,2,\*</sup>

<sup>1</sup> Laboratory "Photoactive Nanocomposite Materials", Saint-Petersburg State University, Ulianovskaia str. 1, Peterhof, 198504 Saint-Petersburg, Russia; maevskaya.mv@gmail.com (M.V.M.); Aida.Rudakova@spbu.ru (A.V.R.); alexei.emeline@spbu.ru (A.V.E.)

<sup>2</sup> Institut fuer Technische Chemie, Gottfried Wilhelm Leibniz Universitaet Hannover, Callinstrasse 3, D-30167 Hannover, Germany

\* Correspondence: bahnemann@iftc.uni-hannover.de

## XRD data

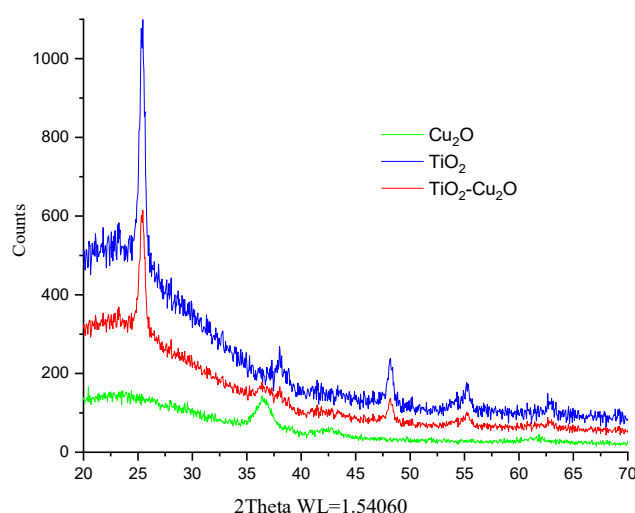

**Figure S1.** XRD patterns of Cu<sub>2</sub>O, TiO<sub>2</sub> and TiO<sub>2</sub>/Cu<sub>2</sub>O heterostructured coatings.

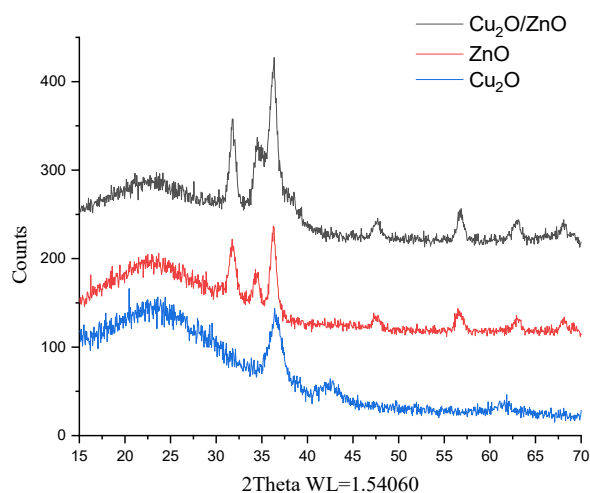

Figure S2. XRD patterns of  $\text{Cu}_2\text{O}$ ,  $\text{ZnO}$  and  $\text{ZnO}/\text{Cu}_2\text{O}$  heterostructured coatings.

## SEM images of the sample surfaces and cross-sections

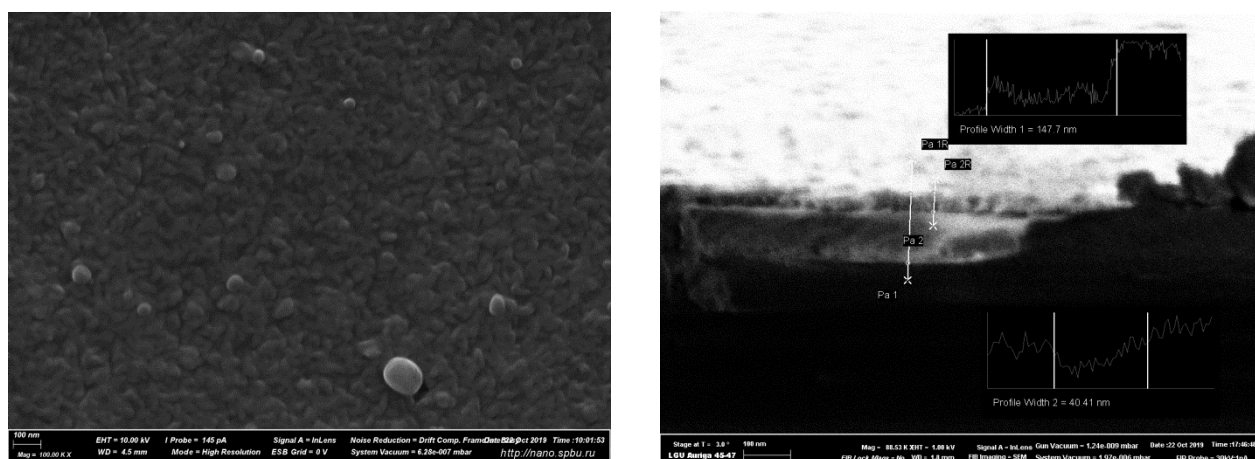

Figure S3. SEM images of the  $\text{TiO}_2$  surface and  $\text{TiO}_2/\text{Cu}_2\text{O}$  cross-section of  $\text{TiO}_2/\text{Cu}_2\text{O}$  coating.

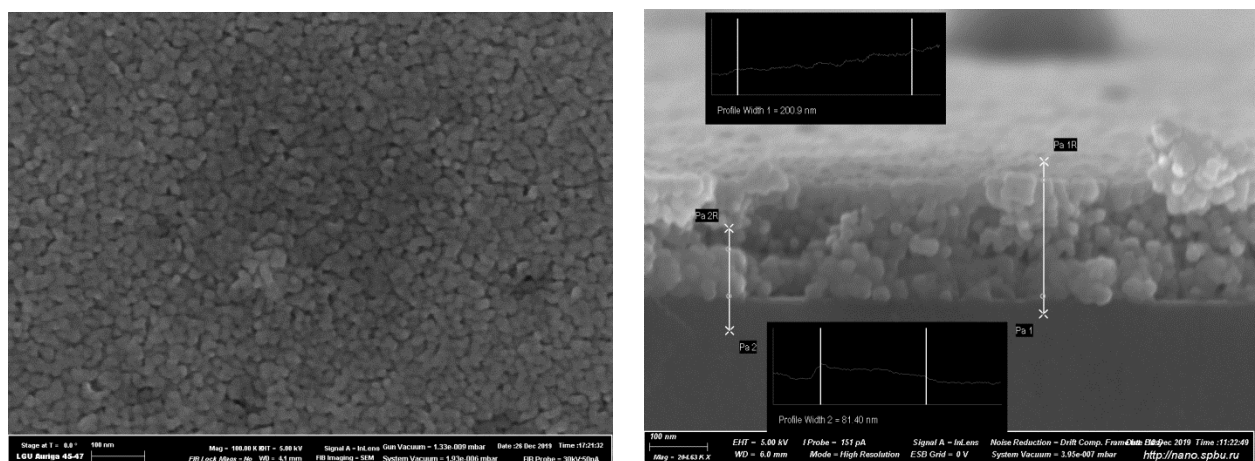

Figure S4. SEM images of the  $\text{TiO}_2$  surface and  $\text{ZnO}/\text{Cu}_2\text{O}$  cross-section of  $\text{ZnO}/\text{Cu}_2\text{O}$  coating.

## AFM image of the surfaces and roughness profiles

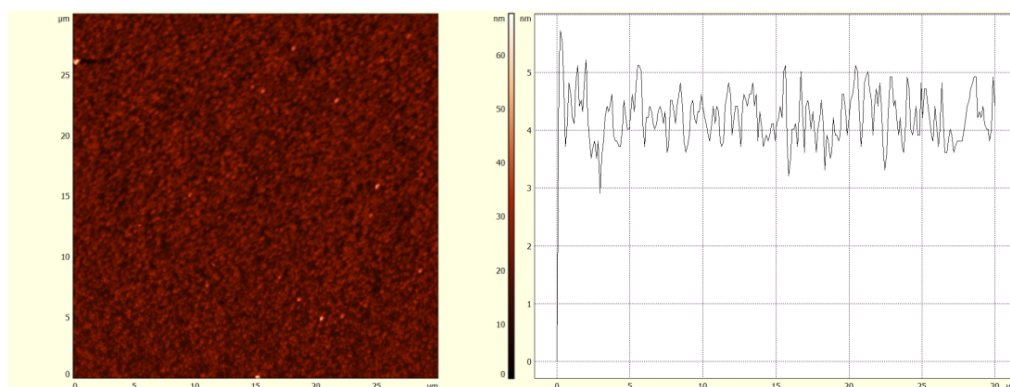

Figure S5. AFM image of the  $\text{TiO}_2$  surface and roughness profile of  $\text{TiO}_2/\text{Cu}_2\text{O}$  coating.

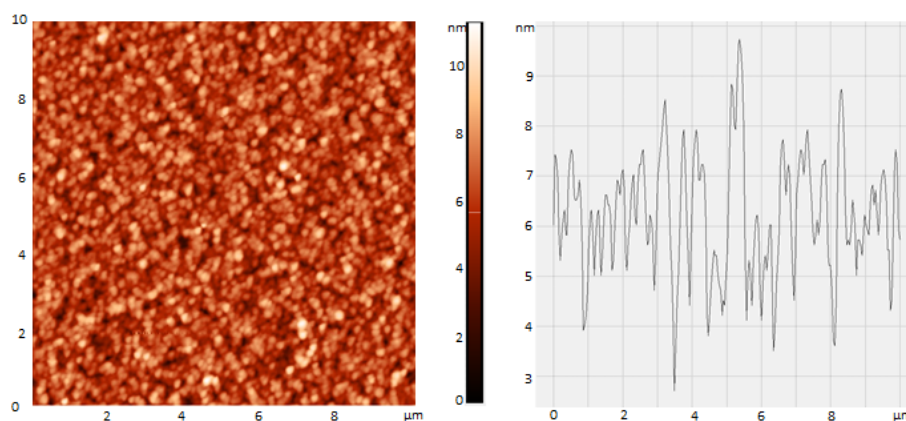

Figure S6. AFM image of the  $\text{ZnO}$  surface and roughness profile of  $\text{ZnO}/\text{Cu}_2\text{O}$  coating.

## Transmittance spectra of individual components and heterostructures.

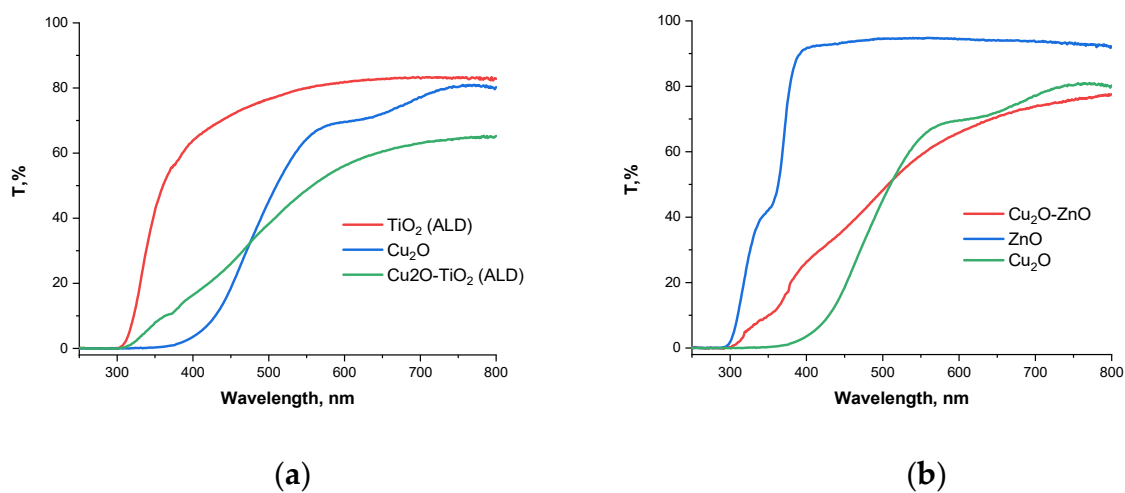

Figure S7. Transmittance spectra of (a)  $\text{TiO}_2/\text{Cu}_2\text{O}$  heterostructured coating and its components, and (b)  $\text{ZnO}/\text{Cu}_2\text{O}$  heterostructured coating and its components.

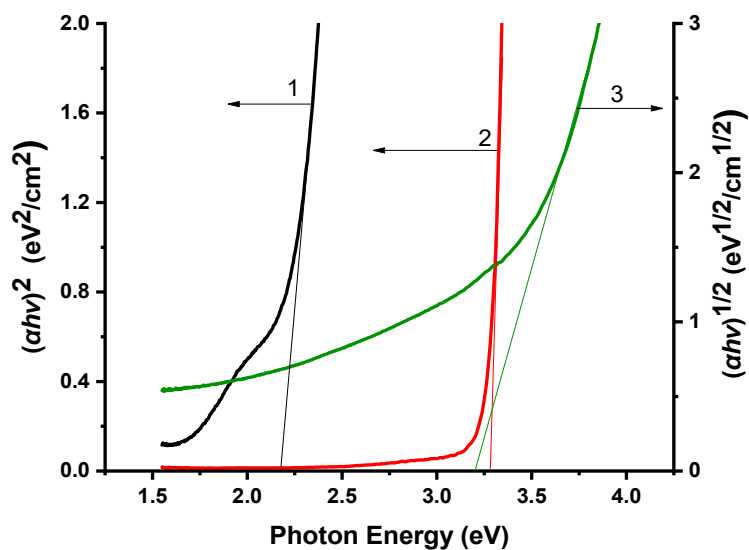

Figure S8. Tauc plots for 1 – Cu<sub>2</sub>O, 2 – ZnO, and 3 – TiO<sub>2</sub>.

### Alteration of SFE and its polar and dispersive components.

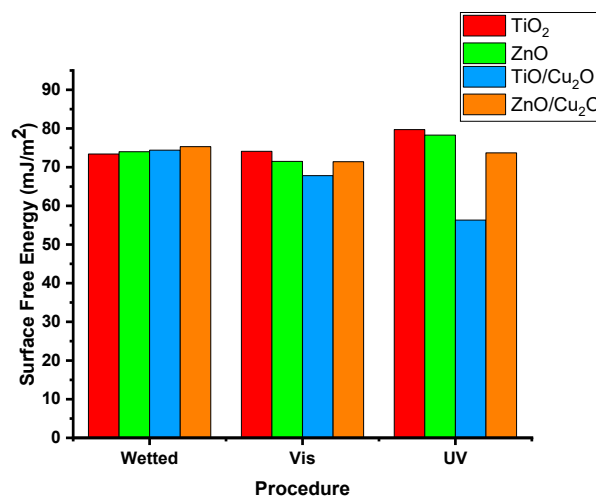

Figure S9. Alteration of the total SFE caused by irradiation with visible and UV light.

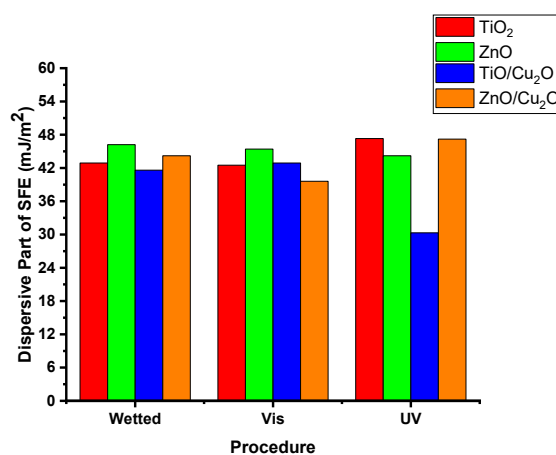

Figure S10. Alteration of the SFE polar component caused by irradiation with visible and UV light.

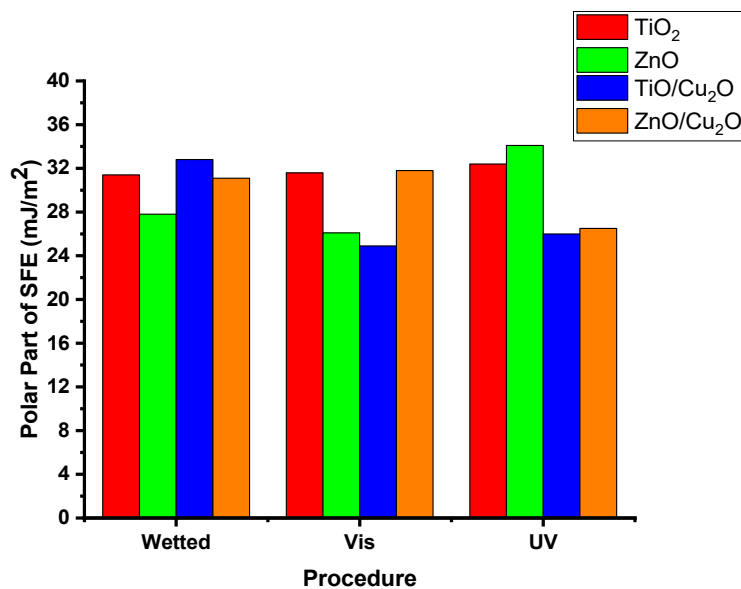

Figure S11. Alteration of the SFE dispersive component caused by irradiation with visible and UV light.

**Alteration of the work function of nanocoatings induced by wetting and UV and visible light irradiation.**

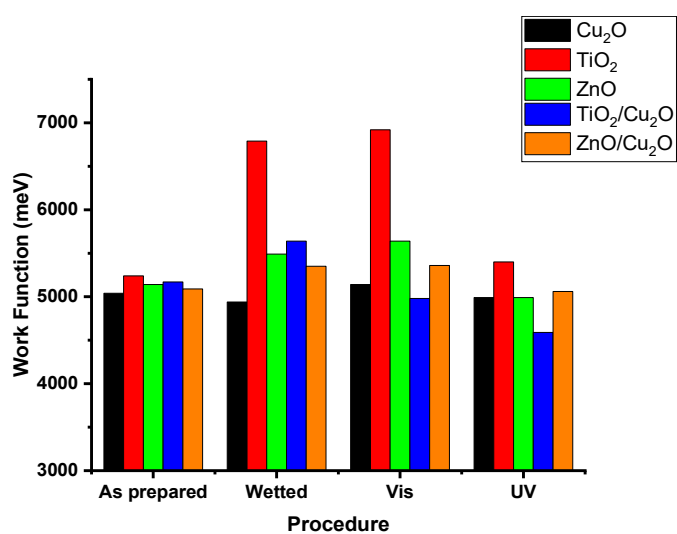

**Figure S12.** Alteration of the work function of nanocoatings induced by wetting and UV and visible light irradiation.
